# Supplementary material for: Role of Surface Chemistry in the In Vitro Lung Response to Nanofibrillated Cellulose
Source: MDPI journal article supplement (doi:10.3390/nano11020389), 2021-02-03
Supplement: s1 [file s1]

## Supplementary Information

### Genotoxicity of nanofibrillated celluloses with different surface chemistry

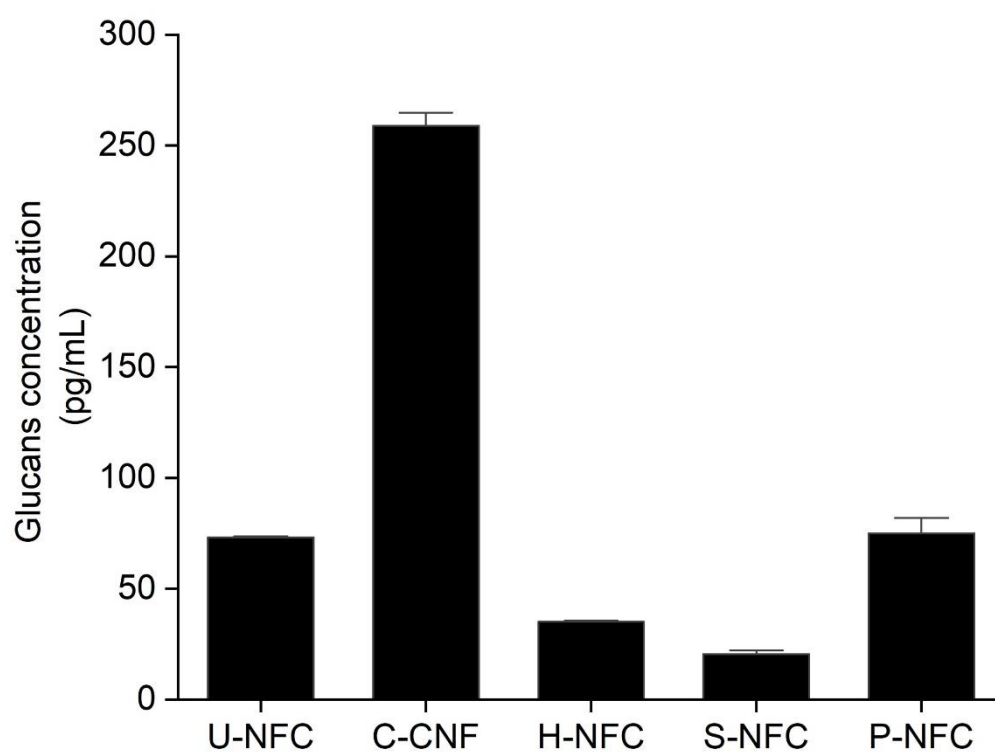

**Figure S1.** Levels of (1,3)-β-D-glucans in extracts of the NFC materials under study.
